# Supplementary material
Source: Springer Nature journal article supplement (https://www.springermedizin.de/resource/supplementary/12967_2012_1197_MOESM6_ESM.pdf/9573300)

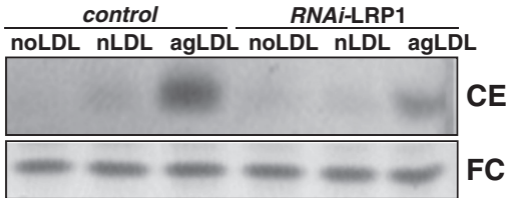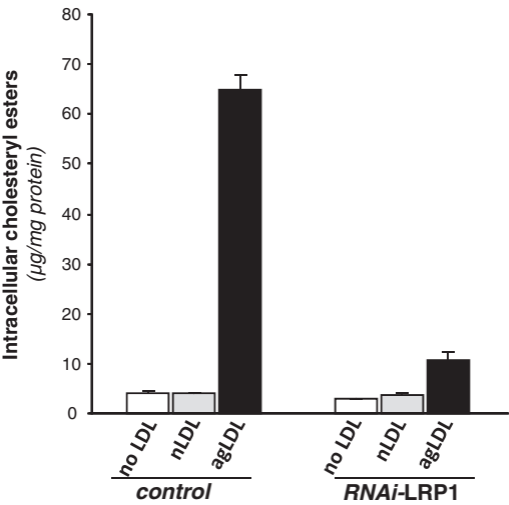

Supplement: MOESM6 [file 9573300]
